# Supplementary material
Source: publisher figshare collection journal article supplement (https://acs.figshare.com/ndownloader/files/3883126)
Supplement: Supplementary file 1 [file 3883126]

Supporting Information (SI)

# **Hydrogel Improved the Response in the Titania (TiO<sub>2</sub>)/Graphene Oxide (GO) One-Dimensional Photonic Crystals (1DPCs)**

*Chong Yao, Jiaoyu Ren, Cihui Liu, Tao Yin, Yanxi Zhu, Liqin Ge\**

State Key Laboratory of Bioelectronics, School of Biological Science and Medical Engineering,  
Southeast University, Nanjing 210096, P. R. China

Corresponding Author

\* E-mail : [lqge@seu.edu.cn](mailto:lqge@seu.edu.cn).

S1: Photographs of a  $\text{TiO}_2$ /hydrogel/GO 1DPC in different organic solvents. The color of the 1DPC does not change, even during the very long reaction time of 24h.

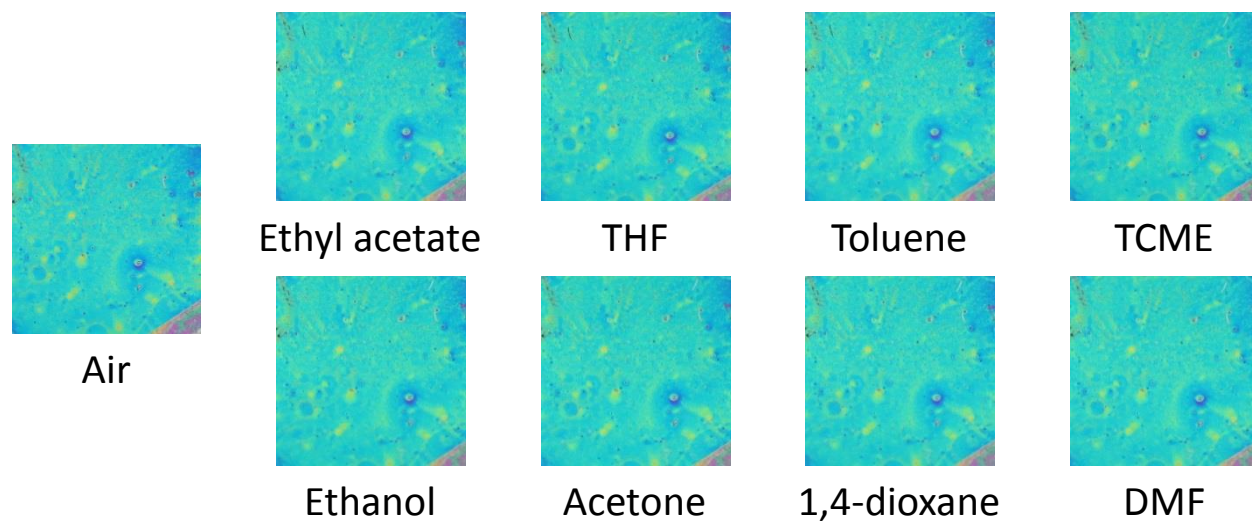

Figure S1. Photographs of a  $\text{TiO}_2$ /hydrogel/GO 1DPC in different organic solvents.
